# Supplementary material for: LINC00240 in the 6p22.1 risk locus promotes gastric cancer progression through USP10-mediated DDX21 stabilization
Source: PubMed Central journal article supplement (PMC10111703; doi:10.1186/s13046-023-02654-9), 2023-04-18

# Supplementary Figure 1

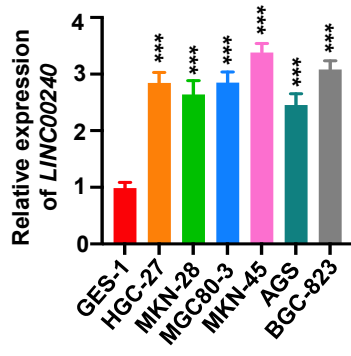

# Supplementary Figure 2

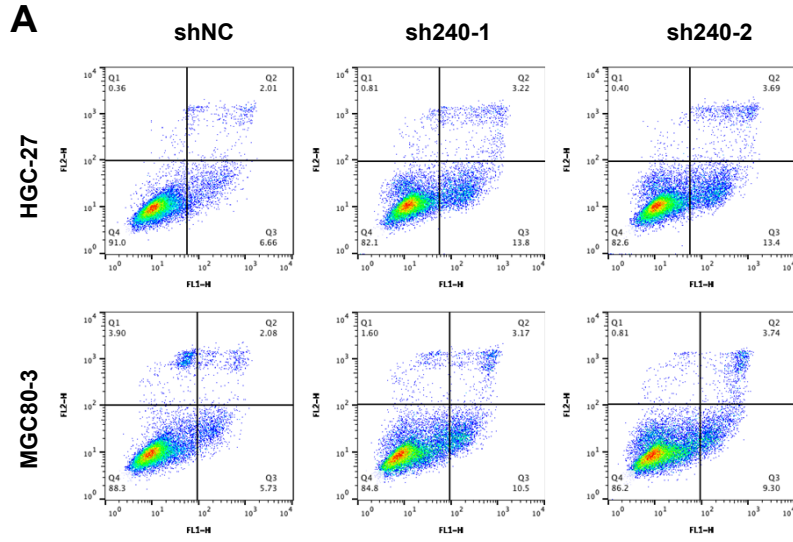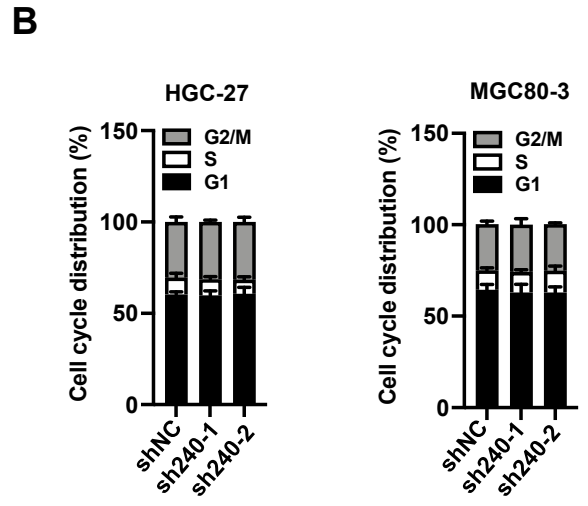

# Supplementary Figure 3

**A**

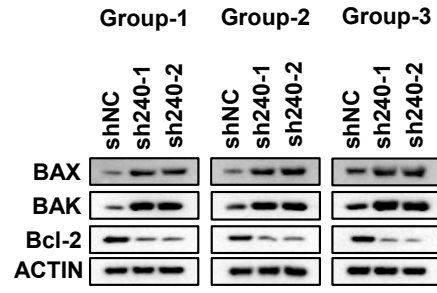

**B**

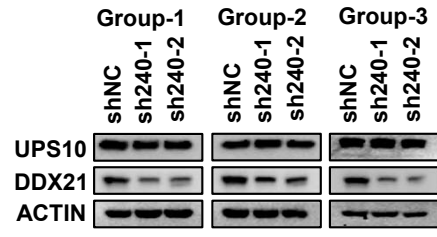

Supplement: 13046_2023_2654_MOESM2_ESM.pdf [file 13046_2023_2654_MOESM2_ESM.pdf]
